# Supplementary material for: Ore quasi disperate
Source: MDPI journal article supplement (doi:10.3390/md19110621), 2009-01-01
Supplement: s1 [file s1]

Supplementary material

# Complete genome sequence of two deep-sea *Streptomyces* isolates from Madeira archipelago and evaluation of their biosynthetic potential

Pedro Albuquerque <sup>1,2</sup>, Inês Ribeiro <sup>3,4</sup>, Sofia Correia <sup>3</sup>, Ana Paula Mucha <sup>3,5</sup>, Paula Tamagnini <sup>1,2,5</sup>, Andreia Braga-Henriques <sup>6,7</sup>, Maria de Fátima Carvalho <sup>3,4</sup> and Marta V. Mendes <sup>1,2\*</sup>

<sup>1</sup> i3S - Instituto de Investigação e Inovação em Saúde, Universidade do Porto, Rua Alfredo Allen 208, 4200-135 Porto, Portugal.

<sup>2</sup> IBMC - Instituto de Biologia Molecular e Celular, Universidade do Porto, Rua Alfredo Allen 208, 4200-135 Porto, Portugal.

<sup>3</sup> CIIMAR - Interdisciplinary Centre of Marine and Environmental Research, University of Porto, Terminal de Cruzeiros do Porto de Leixões, Avenida General Norton de Matos s/n, 4450-208, Matosinhos, Portugal.

<sup>4</sup> ICBAS - Instituto de Ciências Biomédicas Abel Salazar, Universidade do Porto, Rua de Jorge Viterbo Ferreira 228, 4050-313 Porto, Portugal.

<sup>5</sup> Departamento de Biologia, Faculdade de Ciências, Universidade do Porto, Rua do Campo Alegre, Edifício FC4, 4169-007 Porto, Portugal.

<sup>6</sup> OOM - Oceanic Observatory of Madeira & MARE - Marine and Environmental Sciences Centre, ARDITI - Agência Regional para o Desenvolvimento da Investigação Tecnologia e Inovação, Caminho da Penteada, 9020-105 Funchal, Madeira, Portugal.

<sup>7</sup> Regional Directorate for Fisheries, Regional Secretariat for the Sea and Fisheries, Government of the Azores, Rua Cônsul Dabney - Colónia Alemã, 9900-014 Horta, Azores, Portugal.

\* Correspondence: mvm@ibmc.up.pt

**Table S1:** Comparison of COG functional categories. Values are displayed as: hit percentage (number of hits).

|                                                                              | MA3_2.13   | S07_1.15   | <i>S. coelicolor</i><br>A3(2) | <i>S. avermitilis</i><br>MA4680 | <i>S. griseus</i><br>NBRC 13350 |
|------------------------------------------------------------------------------|------------|------------|-------------------------------|---------------------------------|---------------------------------|
| <b>CELLULAR PROCESSES AND SIGNALING</b>                                      |            |            |                               |                                 |                                 |
| <b>[D]</b> Cell cycle control, cell division, chromosome partitioning        | 1,2 (75)   | 1,4 (93)   | 1,2 (101)                     | 1,2 (90)                        | 0,9 (64)                        |
| <b>[M]</b> Cell wall/membrane/envelope biogenesis                            | 4,3 (273)  | 4,3 (281)  | 4,3 (353)                     | 4,3 (326)                       | 4,5 (314)                       |
| <b>[N]</b> Cell motility                                                     | 0,3 (21)   | 0,5 (32)   | 0,5 (38)                      | 0,5 (39)                        | 0,2 (15)                        |
| <b>[O]</b> Post-translational modification, protein turnover, and chaperones | 2,4 (156)  | 2,4 (157)  | 2,5 (206)                     | 2,6 (192)                       | 2,7 (187)                       |
| <b>[T]</b> Signal transduction mechanisms                                    | 5,0 (323)  | 6,2 (402)  | 6,4 (524)                     | 6,1 (457)                       | 5,8 (404)                       |
| <b>[U]</b> Intracellular trafficking, secretion, and vesicular transport     | 1,2 (76)   | 1,2 (81)   | 1,1 (92)                      | 1,1 (83)                        | 0,9 (60)                        |
| <b>[V]</b> Defense mechanisms                                                | 2,0 (130)  | 2,1 (139)  | 2,2 (180)                     | 2 (154)                         | 2,4 (166)                       |
| <b>[W]</b> Extracellular structures                                          | 0,0 (1)    | 0,0 (1)    | 0,0 (1)                       | 0,0 (2)                         | 0,0 (0)                         |
| <b>[Y]</b> Nuclear structure                                                 | 0,0 (0)    | 0,0 (0)    | 0,0 (0)                       | 0,0 (0)                         | 0,0 (0)                         |
| <b>[Z]</b> Cytoskeleton                                                      | 0,1 (6)    | 0,1 (4)    | 0,1 (9)                       | 0,1 (4)                         | 0,1 (4)                         |
| <b>INFORMATION STORAGE AND PROCESSING</b>                                    |            |            |                               |                                 |                                 |
| <b>[A]</b> RNA processing and modification                                   | 0,0 (3)    | 0,1 (5)    | 0,0 (4)                       | 0,0 (3)                         | 0,0 (1)                         |
| <b>[B]</b> Chromatin structure and dynamics                                  | 0,1 (4)    | 0,0 (3)    | 0,0 (4)                       | 0,0 (3)                         | 0,0 (3)                         |
| <b>[J]</b> Translation, ribosomal structure and biogenesis                   | 3,4 (219)  | 3,3 (215)  | 3,1 (256)                     | 3,2 (237)                       | 3,2 (223)                       |
| <b>[K]</b> Transcription                                                     | 11,9 (765) | 10,0 (646) | 12,5 (1016)                   | 11,6 (870)                      | 11,1 (771)                      |
| <b>[L]</b> Replication, recombination and repair                             | 4,8 (307)  | 4,3 (278)  | 4,6 (378)                     | 4,5 (337)                       | 3,9 (275)                       |
| <b>METABOLISM</b>                                                            |            |            |                               |                                 |                                 |
| <b>[C]</b> Energy production and conversion                                  | 4,9 (312)  | 5,1 (332)  | 5,1 (414)                     | 5,0 (372)                       | 4,8 (336)                       |
| <b>[E]</b> Amino acid transport and metabolism                               | 8,5 (544)  | 7,5 (487)  | 7,9 (647)                     | 9,0 (674)                       | 8,9 (620)                       |
| <b>[F]</b> Nucleotide transport and metabolism                               | 1,9 (122)  | 1,7 (112)  | 1,8 (145)                     | 1,8 (134)                       | 1,7 (119)                       |
| <b>[G]</b> Carbohydrate transport and metabolism                             | 8,7 (559)  | 6,9 (450)  | 8,5 (695)                     | 8,1 (606)                       | 6,9 (483)                       |
| <b>[H]</b> Coenzyme transport and metabolism                                 | 3,1 (197)  | 3,0 (194)  | 2,9 (239)                     | 2,7 (200)                       | 2,9 (200)                       |
| <b>[I]</b> Lipid transport and metabolism                                    | 4,0 (256)  | 4,0 (260)  | 4,2 (340)                     | 4,8 (361)                       | 4,4 (307)                       |
| <b>[P]</b> Inorganic ion transport and metabolism                            | 5,7 (365)  | 4,0 (262)  | 4,7 (387)                     | 4,3 (323)                       | 5,7 (398)                       |
| <b>[Q]</b> Secondary metabolites biosynthesis, transport, and catabolism     | 5,2 (333)  | 3,4 (222)  | 3,8 (306)                     | 4,8 (360)                       | 4,3 (302)                       |
| <b>POORLY CHARACTERIZED</b>                                                  |            |            |                               |                                 |                                 |
| <b>[S]</b> Function unknown                                                  | 13,6 (874) | 14,5 (939) | 14,7 (1202)                   | 15,1 (1136)                     | 19,1 (1331)                     |
| No COG in database                                                           | 9,0 (579)  | 13,1 (853) | 3,3 (271)                     | 3,1 (236)                       | 2,6 (182)                       |

|                          |      |      |      |      |      |
|--------------------------|------|------|------|------|------|
| Total number of proteins | 6412 | 6492 | 8154 | 7514 | 6968 |
|--------------------------|------|------|------|------|------|

**Table S2:** Genomic islands identified in the genomes of MA3\_213 and S07\_1.15

| Isolate   | Genomic Island | Island start | Island end | Length (bp) | Method           | Relevant features                                                  |
|-----------|----------------|--------------|------------|-------------|------------------|--------------------------------------------------------------------|
| MA3_2.13  | 1              | 4663         | 32547      | 27884       | IslandPath-DIMOB |                                                                    |
|           | 2              | 607493       | 616900     | 9407        | IslandPath-DIMOB |                                                                    |
|           | 3              | 1663087      | 1678018    | 14931       | IslandPath-DIMOB | Mobile element protein                                             |
|           | 4              | 2600374      | 2622924    | 22550       | IslandPath-DIMOB | CRISPR-associated proteins and Mobile element proteins             |
|           | 5              | 3009903      | 3023877    | 13974       | IslandPath-DIMOB |                                                                    |
|           | 6              | 3041928      | 3071784    | 29856       | IslandPath-DIMOB | Integrase                                                          |
|           | 7              | 3092105      | 3135603    | 43498       | IslandPath-DIMOB | Mobile element protein                                             |
|           | 8              | 3226506      | 3232914    | 6408        | IslandPath-DIMOB | Transposase                                                        |
|           | 9              | 3273702      | 3290977    | 17275       | IslandPath-DIMOB | Mobile element protein and Integrases                              |
|           | 10             | 3382536      | 3395029    | 12493       | IslandPath-DIMOB | Phage-related proteins and Excisionase                             |
|           | 11             | 3809724      | 3826244    | 16520       | IslandPath-DIMOB |                                                                    |
|           | 12             | 4092154      | 4107121    | 14967       | IslandPath-DIMOB | Integrase and Excisionase                                          |
|           | 13             | 4703582      | 4751050    | 47468       | IslandPath-DIMOB | CRISPR-associated proteins, Mobile element protein and Transposase |
|           | 14             | 4759298      | 4800157    | 40859       | IslandPath-DIMOB |                                                                    |
|           | 15             | 4925394      | 4942767    | 17373       | IslandPath-DIMOB | Phage-related protein and Mobile element proteins                  |
|           | 16             | 6652236      | 6660866    | 8630        | IslandPath-DIMOB | Mobile element protein                                             |
|           | 17             | 6709831      | 6734986    | 25155       | IslandPath-DIMOB | Transposases                                                       |
| S071_1.15 | 1              | 820799       | 825992     | 5193        | SIGI-HMM         |                                                                    |
|           | 2              | 865249       | 870073     | 4824        | SIGI-HMM         |                                                                    |
|           | 3              | 884459       | 890019     | 5560        | SIGI-HMM         |                                                                    |
|           | 4              | 912766       | 918930     | 6164        | SIGI-HMM         |                                                                    |
|           | 5              | 923285       | 976748     | 53463       | IslandPath-DIMOB | CRISPR-associated proteins, Mobile element protein and Transposase |
|           |                | 928312       | 934464     | 6152        | SIGI-HMM         | CRISPR-associated proteins                                         |
|           |                | 937240       | 954011     | 16771       | SIGI-HMM         | Mobile element protein and Transposase                             |
|           | 6              | 1022226      | 1065261    | 43035       | IslandPath-DIMOB | Mobile element proteins and Integrase                              |
|           |                | 1053820      | 1060195    | 6375        | SIGI-HMM         | Integrase                                                          |
|           |                | 2067148      | 2071285    | 4137        | SIGI-HMM         |                                                                    |
|           | 7              | 2069658      | 2084180    | 14522       | IslandPath-DIMOB | Transposase                                                        |
|           |                | 2240674      | 2255374    | 14700       | SIGI-HMM         |                                                                    |
|           | 9              | 2625726      | 2634395    | 8669        | IslandPath-DIMOB | Integrase                                                          |
|           | 10             | 2648868      | 2652958    | 4090        | SIGI-HMM         |                                                                    |
|           | 11             | 2790463      | 2808442    | 17979       | IslandPath-DIMOB | Phage-related protein                                              |
|           | 12             | 2983614      | 2988106    | 4492        | SIGI-HMM         |                                                                    |
|           | 13             | 3179595      | 3191350    | 11755       | IslandPath-DIMOB |                                                                    |
|           | 14             | 3298107      | 3318922    | 20815       | IslandPath-DIMOB | Mobile element proteins                                            |
|           | 15             | 3912705      | 3918872    | 6167        | SIGI-HMM         |                                                                    |
|           | 16             | 4021957      | 4041330    | 19373       | IslandPath-DIMOB | Integrase                                                          |
|           | 17             | 4247704      | 4253460    | 5756        | IslandPath-DIMOB | Mobile element proteins and Transposases                           |
|           |                | 4247704      | 4255562    | 7858        | SIGI-HMM         | Mobile element proteins and Transposases                           |
|           | 18             | 4658659      | 4664088    | 5429        | SIGI-HMM         |                                                                    |
|           | 19             | 4921286      | 4925629    | 4343        | SIGI-HMM         |                                                                    |
|           | 20             | 5029398      | 5033675    | 4277        | SIGI-HMM         | CRISPR-associated proteins                                         |
|           | 21             | 5037727      | 5045680    | 7953        | SIGI-HMM         | CRISPR-associated protein                                          |
|           | 22             | 5079814      | 5085097    | 5283        | SIGI-HMM         |                                                                    |
|           | 23             | 5097089      | 5102713    | 5624        | SIGI-HMM         |                                                                    |
|           | 24             | 5163503      | 5168283    | 4780        | SIGI-HMM         |                                                                    |
|           | 25             | 5852832      | 5871205    | 18373       | SIGI-HMM         |                                                                    |
|           | 26             | 7089390      | 7093434    | 4044        | SIGI-HMM         | Mobile element protein                                             |
|           | 27             | 7155497      | 7163263    | 7766        | SIGI-HMM         |                                                                    |
|           | 29             | 7167448      | 7174408    | 6960        | SIGI-HMM         | CRISPR-associated protein                                          |
|           |                | 7181331      | 7189028    | 7697        | SIGI-HMM         |                                                                    |
|           |                | 7181503      | 7250325    | 68822       | IslandPath-DIMOB | Mobile element proteins                                            |
|           |                | 7211301      | 7215383    | 4082        | SIGI-HMM         |                                                                    |

**Table S3:** Identified prophage regions

| Isolate          | Region | Region Length | Completeness | Score | # Total Proteins | Region Position | Model            |
|------------------|--------|---------------|--------------|-------|------------------|-----------------|------------------|
| <b>MA3 2.13</b>  | 1      | 18.9Kb        | incomplete   | 30    | 15               | 3377225-3396181 | PHAGE_Caulob_Co  |
|                  | 1      | 8.3Kb         | incomplete   | 10    | 11               | 422931-431231   | PHAGE_Strept_Idi |
| <b>S071 1.15</b> | 2      | 11.1Kb        | incomplete   | 20    | 9                | 969242-980378   | PHAGE_Mycoba_A   |
|                  | 3      | 6.4Kb         | incomplete   | 10    | 10               | 2576920-2583329 | PHAGE_Strept_Da  |
|                  | 4      | 6.6Kb         | incomplete   | 10    | 10               | 3942773-3949468 | PHAGE_Strept_Idi |
|                  | 5      | 9.6Kb         | incomplete   | 10    | 9                | 5050356-5060016 | PHAGE_Gordon_G   |
|                  | 6      | 6.2Kb         | incomplete   | 30    | 8                | 5257587-5263873 | PHAGE_Strept_Pic |
|                  | 7      | 8.6Kb         | incomplete   | 10    | 9                | 6644103-6652740 | PHAGE_Strept_Pic |
|                  | 8      | 6.4Kb         | incomplete   | 20    | 7                | 7055804-7062223 | PHAGE_Synech_S   |

**Table S4:** Average nucleotide identity (ANI; %) values between isolates MA3\_2.13, S07\_1.15 and their closest strains as determined by the WGS-based tree.

|                                                   | 1     | 2     | 3     | 4     | 5     | 6     | 7     | 8     | 9     | 10    | 11    | 12    | 13    | 14    | 15    | 16    | 17    | 18    | 19    | 20    | 21    | 22    | 23    | 24    | 25    | 26    | 27    | 28    | 29    | 30    | 31    |
|---------------------------------------------------|-------|-------|-------|-------|-------|-------|-------|-------|-------|-------|-------|-------|-------|-------|-------|-------|-------|-------|-------|-------|-------|-------|-------|-------|-------|-------|-------|-------|-------|-------|-------|
| 1) <i>Streptomyces autalyticus</i> CGMCC0516      |       | 81,22 | 76,39 | 76,32 | 75,41 | 98,49 | 82,91 | 75,24 | 97,88 | 83,24 | 97,90 | 76,49 | 78,54 | 78,40 | 83,08 | 77,81 | 77,03 | 77,75 | 98,41 | 90,21 | 76,74 | 76,39 | 90,70 | 90,71 | 76,47 | 78,48 | 90,26 | 76,24 | 76,86 | 78,91 | 78,25 |
| 2) <i>Streptomyces bingchengensis</i> BCW-1       | 81,67 |       | 76,58 | 76,75 | 75,13 | 81,70 | 81,25 | 75,72 | 81,68 | 81,59 | 81,67 | 76,40 | 78,36 | 78,33 | 81,47 | 78,27 | 76,89 | 78,30 | 81,68 | 81,88 | 76,55 | 76,54 | 81,88 | 81,86 | 76,60 | 78,27 | 81,74 | 76,44 | 76,66 | 78,60 | 78,48 |
| 3) <i>Streptomyces</i> sp CMB-StM0423             | 77,24 | 77,16 |       | 77,03 | 75,93 | 77,15 | 77,22 | 76,50 | 77,12 | 77,39 | 77,12 | 76,57 | 77,66 | 77,66 | 77,36 | 77,53 | 76,81 | 77,44 | 77,14 | 77,18 | 76,53 | 94,43 | 77,13 | 77,12 | 94,79 | 77,46 | 77,10 | 77,15 | 76,71 | 77,65 | 77,59 |
| 4) <i>Streptomyces albus</i> CAS922               | 77,46 | 77,61 | 76,99 |       | 76,42 | 77,44 | 77,60 | 76,66 | 77,46 | 77,74 | 77,47 | 77,25 | 77,87 | 78,21 | 77,59 | 77,70 | 78,24 | 77,58 | 77,37 | 77,48 | 77,21 | 76,95 | 77,28 | 77,40 | 77,05 | 77,81 | 77,49 | 80,69 | 77,45 | 78,16 | 77,70 |
| 5) MA3_2.13                                       | 75,90 | 75,36 | 75,46 | 75,54 |       | 75,86 | 75,47 | 77,90 | 75,52 | 75,64 | 75,52 | 77,35 | 75,55 | 76,49 | 75,57 | 75,42 | 75,88 | 75,39 | 75,83 | 75,47 | 77,41 | 75,48 | 75,44 | 75,44 | 75,50 | 75,51 | 75,42 | 75,57 | 77,51 | 76,71 | 75,34 |
| 6) <i>Streptomyces salisilvae</i> HNM0141         | 97,84 | 81,00 | 76,17 | 76,27 | 75,24 |       | 82,55 | 75,28 | 98,07 | 82,86 | 98,08 | 76,29 | 78,06 | 78,15 | 82,76 | 77,64 | 76,89 | 77,56 | 98,33 | 89,66 | 76,44 | 76,20 | 90,28 | 90,29 | 76,29 | 78,04 | 89,83 | 76,24 | 76,45 | 78,65 | 78,04 |
| 7) <i>Streptomyces</i> sp NA02950                 | 83,87 | 81,81 | 76,82 | 77,29 | 75,91 | 83,81 |       | 76,32 | 83,79 | 83,53 | 83,78 | 76,94 | 78,98 | 78,53 | 83,32 | 78,81 | 76,98 | 78,68 | 83,76 | 83,86 | 76,99 | 76,84 | 83,92 | 83,98 | 77,02 | 78,89 | 83,88 | 76,97 | 77,16 | 78,69 | 78,96 |
| 8) <i>Streptomyces</i> sp. SCSIO 3032             | 76,33 | 76,39 | 76,36 | 76,47 | 78,34 | 76,32 | 76,44 |       | 76,34 | 76,74 | 76,34 | 77,99 | 76,79 | 76,85 | 76,62 | 76,67 | 76,50 | 76,57 | 76,33 | 76,30 | 78,04 | 76,36 | 76,25 | 76,23 | 76,38 | 76,74 | 76,30 | 76,54 | 78,24 | 77,12 | 76,48 |
| 9) <i>Streptomyces malaysiensis</i> DSM 4137      | 97,68 | 81,18 | 76,23 | 76,39 | 75,09 | 98,47 | 82,81 | 75,36 |       | 83,32 | 99,98 | 76,37 | 78,35 | 78,26 | 83,09 | 77,76 | 76,84 | 77,64 | 98,37 | 90,06 | 76,53 | 76,25 | 90,69 | 90,61 | 76,31 | 78,24 | 90,20 | 76,34 | 76,67 | 78,67 | 78,20 |
| 10) <i>Streptomyces</i> sp Rer75                  | 83,43 | 81,40 | 76,56 | 76,74 | 75,39 | 83,37 | 82,76 | 75,86 | 83,46 |       | 83,46 | 76,68 | 78,33 | 78,63 | 94,70 | 78,34 | 77,18 | 78,18 | 83,35 | 83,60 | 76,77 | 76,62 | 83,72 | 83,73 | 76,70 | 78,34 | 83,63 | 76,52 | 76,78 | 79,05 | 78,72 |
| 11) <i>Streptomyces malaysiensis</i> DSM 4137     | 97,64 | 81,21 | 76,24 | 76,36 | 75,02 | 98,48 | 82,84 | 75,45 | 99,97 | 83,31 |       | 76,40 | 78,42 | 78,26 | 83,12 | 77,88 | 76,89 | 77,64 | 98,37 | 90,09 | 76,51 | 76,30 | 90,72 | 90,66 | 76,29 | 78,31 | 90,20 | 76,41 | 76,63 | 78,69 | 78,14 |
| 12) <i>Streptomyces xiamenensis</i> MCCC:1A01550  | 77,17 | 77,09 | 76,70 | 77,29 | 77,70 | 77,14 | 77,28 | 78,09 | 77,15 | 77,27 | 77,15 |       | 77,41 | 77,41 | 77,20 | 77,34 | 76,64 | 77,23 | 77,17 | 77,09 | 97,87 | 76,81 | 77,09 | 77,01 | 76,79 | 77,31 | 77,06 | 77,26 | 86,99 | 77,35 | 77,14 |
| 13) <i>Streptomyces buecheae</i> AC541            | 79,29 | 79,05 | 77,47 | 77,61 | 76,16 | 79,57 | 79,14 | 76,78 | 79,63 | 79,45 | 79,61 | 77,42 |       | 78,98 | 79,33 | 78,99 | 77,75 | 78,92 | 79,58 | 79,52 | 77,40 | 77,43 | 79,42 | 79,42 | 77,57 | 96,23 | 79,49 | 77,19 | 77,54 | 79,27 | 79,00 |
| 14) <i>Streptomyces xinghaiensis</i> S187         | 79,14 | 79,08 | 77,95 | 78,17 | 76,79 | 79,08 | 79,09 | 77,06 | 79,05 | 79,20 | 79,07 | 77,44 | 79,28 |       | 79,16 | 79,30 | 77,48 | 79,40 | 79,08 | 79,07 | 77,34 | 77,98 | 78,99 | 79,06 | 78,02 | 79,29 | 79,16 | 78,10 | 77,58 | 95,87 | 79,53 |
| 15) <i>Streptomyces</i> sp RTd22                  | 83,35 | 81,37 | 76,65 | 76,64 | 75,32 | 83,29 | 82,62 | 75,83 | 83,32 | 94,77 | 83,33 | 76,44 | 78,35 | 78,44 |       | 78,28 | 76,86 | 78,08 | 83,30 | 83,48 | 76,54 | 76,65 | 83,58 | 83,69 | 76,79 | 78,27 | 83,58 | 76,39 | 76,83 | 78,88 | 78,71 |
| 16) <i>Streptomyces albireticuli</i> MDK11        | 78,76 | 78,85 | 77,23 | 77,37 | 75,96 | 78,74 | 78,84 | 76,49 | 78,75 | 79,04 | 78,76 | 77,08 | 78,93 | 79,07 | 79,01 |       | 77,44 | 83,34 | 78,73 | 78,80 | 77,12 | 77,24 | 78,67 | 78,70 | 77,24 | 78,82 | 78,71 | 77,38 | 77,29 | 79,25 | 84,34 |
| 17) <i>Streptomyces</i> sp ASO4wet                | 77,23 | 77,31 | 77,00 | 78,08 | 76,02 | 77,19 | 77,13 | 76,46 | 77,19 | 77,44 | 77,18 | 76,54 | 77,64 | 77,52 | 77,30 | 77,51 |       | 77,53 | 77,15 | 77,10 | 76,65 | 77,07 | 77,14 | 77,13 | 77,05 | 77,60 | 77,11 | 78,29 | 76,67 | 77,53 | 77,54 |
| 18) <i>Streptomyces rectiverticillatus</i> B15-08 | 78,86 | 78,97 | 77,35 | 77,53 | 76,03 | 78,78 | 79,07 | 76,59 | 78,83 | 79,09 | 78,82 | 77,10 | 79,08 | 79,18 | 78,98 | 83,49 | 77,42 |       | 78,79 | 78,86 | 77,04 | 77,33 | 78,80 | 78,81 | 77,38 | 79,21 | 78,85 | 77,40 | 77,20 | 79,32 | 83,18 |
| 19) <i>Streptomyces</i> sp M56                    | 97,84 | 81,07 | 76,17 | 76,25 | 75,22 | 98,43 | 82,69 | 75,19 | 98,08 | 83,00 | 98,09 | 76,33 | 78,16 | 78,17 | 82,87 | 77,61 | 76,75 | 77,51 |       | 89,83 | 76,46 | 76,20 | 90,38 | 90,40 | 76,30 | 78,06 | 89,90 | 76,28 | 76,58 | 78,74 | 78,08 |
| 20) <i>Streptomyces violaceusniger</i> Tu 4113    | 90,41 | 81,70 | 76,51 | 76,58 | 75,12 | 90,46 | 83,13 | 75,44 | 90,48 | 83,65 | 90,49 | 76,36 | 78,51 | 78,33 | 83,46 | 78,17 | 76,87 | 77,94 | 90,47 |       | 76,54 | 76,51 | 94,85 | 94,88 | 76,66 | 78,51 | 94,46 | 76,25 | 76,71 | 78,73 | 78,43 |
| 21) <i>Streptomyces</i> sp XC 2026                | 77,20 | 77,13 | 76,64 | 77,29 | 77,76 | 77,06 | 77,40 | 78,13 | 77,11 | 77,23 | 77,11 | 97,88 | 77,53 | 77,23 | 77,13 | 77,31 | 76,66 | 77,25 | 77,11 | 77,16 |       | 76,77 | 77,11 | 77,13 | 76,70 | 77,43 | 77,08 | 77,16 | 86,96 | 77,32 | 77,24 |
| 22) <i>Streptomyces</i> sp CNQ-509                | 77,29 | 77,21 | 94,54 | 76,87 | 76,08 | 77,20 | 77,20 | 76,41 | 77,17 | 77,31 | 77,17 | 76,49 | 77,64 | 77,69 | 77,31 | 77,53 | 76,77 | 77,45 | 77,20 | 77,21 | 76,47 |       | 77,21 | 77,24 | 97,12 | 77,52 | 77,21 | 77,07 | 76,75 | 77,71 | 77,59 |
| 23) <i>Streptomyces</i> sp 11-1-2                 | 90,72 | 81,62 | 76,48 | 76,25 | 75,05 | 90,85 | 83,09 | 75,34 | 90,88 | 83,68 | 90,89 | 76,25 | 78,29 | 78,34 | 83,55 | 77,97 | 76,84 | 77,69 | 90,82 | 94,73 | 76,42 | 76,51 |       | 98,39 | 76,44 | 78,23 | 94,21 | 76,19 | 76,61 | 78,71 | 78,31 |
| 24) <i>Streptomyces hygroscopicus</i> XM201       | 90,71 | 81,68 | 76,43 | 76,44 | 75,02 | 90,84 | 83,13 | 75,31 | 90,80 | 83,60 | 90,81 | 76,25 | 78,39 | 78,24 | 83,57 | 77,99 | 76,73 | 77,88 | 90,82 | 94,67 | 76,52 | 76,44 | 98,40 |       | 76,48 | 78,32 | 94,15 | 76,25 | 76,54 | 78,67 | 78,36 |
| 25) <i>Streptomyces</i> sp WAC 06738              | 77,39 | 77,27 | 94,69 | 76,99 | 75,90 | 77,31 | 77,26 | 76,38 | 77,31 | 77,55 | 77,29 | 76,58 | 77,67 | 77,69 | 77,52 | 77,57 | 76,83 | 77,58 | 77,32 | 77,39 | 76,59 | 97,00 | 77,18 | 77,23 |       | 77,65 | 77,33 | 77,02 | 76,75 | 77,65 | 77,74 |
| 26) <i>Streptomyces buecheae</i> NA00687          | 79,09 | 78,76 | 77,12 | 77,48 | 75,95 | 79,43 | 79,03 | 76,61 | 79,37 | 79,23 | 79,36 | 77,11 | 96,12 | 79,04 | 79,17 | 78,83 | 77,60 | 78,83 | 79,40 | 79,33 | 77,06 | 77,19 | 79,23 | 79,26 | 77,39 |       | 79,41 | 76,95 | 77,30 | 79,13 | 78,87 |
| 27) <i>Streptomyces antimycoticus</i> NBRC 100767 | 90,57 | 81,75 | 76,50 | 76,75 | 75,38 | 90,71 | 83,35 | 75,68 | 90,73 | 83,90 | 90,74 | 76,48 | 78,74 | 78,47 | 83,75 | 78,23 | 76,84 | 78,08 | 90,69 | 94,73 | 76,69 | 76,60 | 94,60 | 94,57 | 76,73 | 78,74 |       | 76,52 | 76,74 | 78,76 | 78,75 |
| 28) <i>Streptomyces</i> sp NHF165                 | 77,06 | 77,07 | 76,98 | 80,72 | 76,13 | 77,31 | 77,00 | 76,71 | 77,23 | 77,12 | 77,23 | 76,99 | 77,14 | 77,87 | 77,01 | 77,41 | 78,22 | 77,23 | 77,31 | 77,07 | 76,94 | 76,92 | 77,05 | 77,06 | 76,97 | 77,09 | 77,02 |       | 76,98 | 78,01 | 77,50 |
| 29) <i>Streptomyces harbinensis</i> NA02264       | 77,28 | 77,16 | 76,75 | 77,38 | 77,72 | 77,21 | 77,44 | 78,23 | 77,26 | 77,34 | 77,26 | 86,95 | 77,63 | 77,55 | 77,25 | 77,42 | 76,54 | 77,27 | 77,16 | 77,17 | 86,92 | 76,88 | 77,17 | 77,17 | 76,84 | 77,57 | 77,16 | 77,37 |       | 77,54 | 77,29 |
| 30) S07_1.15                                      | 79,10 | 79,09 | 78,05 | 78,03 | 76,88 | 79,07 | 79,16 | 77,21 | 79,00 | 79,29 | 79,01 | 77,56 | 79,19 | 95,83 | 79,17 | 79,45 | 77,47 | 79,45 | 79,09 | 78,94 | 77,48 | 78,07 | 78,94 | 79,00 | 78,03 | 79,18 | 79,01 | 78,08 | 77,78 |       | 79,64 |
| 31) <i>Streptomyces olivoreticuli</i> ATCC 31159  | 78,88 | 78,64 | 76,99 | 77,13 | 75,58 | 78,86 | 78,62 | 75,95 | 78,84 | 79,19 | 78,83 | 76,87 | 78,66 | 78,93 | 79,08 | 83,92 | 77,39 | 82,46 | 78,79 | 78,90 | 76,89 | 77,04 | 78,84 | 78,93 | 77,11 | 78,58 | 79,02 | 76,98 | 77,07 | 79,36 |       |

**Table S5:** Presence of putative Marine Adaptation Genes in the sequenced strains.

| MAG type                                   | MA3_2.13 gene            | MA3_2.13 annotation                                                                                        | S07_1.15 gene | S07_1.15 annotation                                                 |
|--------------------------------------------|--------------------------|------------------------------------------------------------------------------------------------------------|---------------|---------------------------------------------------------------------|
| ABC transporter                            | prot_01227               | putative acyl-peptide hydrolase                                                                            |               |                                                                     |
| ABC transporter                            | prot_05689               | Phosphate ABC transporter, permease protein PstA                                                           | prot_03574*   | Phosphate ABC transporter, permease protein PstC                    |
| ABC transporter                            | prot_03522<br>prot_02557 | Phosphate ABC transporter, ATP-binding protein PstB                                                        | prot_03572    | Phosphate ABC transporter, ATP-binding protein PstB                 |
| ABC transporter                            | prot_03184               | Branched-chain amino acid ABC transporter, ATP-binding protein LivG                                        | prot_05342    | Branched-chain amino acid ABC transporter, ATP-binding protein LivG |
| ABC transporter                            | prot_03185               | Branched-chain amino acid ABC transporter, ATP-binding protein LivF                                        | prot_05341    | Branched-chain amino acid ABC transporter, ATP-binding protein LivF |
| ABC transporter                            | prot_03182               | Branched-chain amino acid ABC transporter, permease protein LivH                                           | prot_05344*   | Branched-chain amino acid ABC transporter, permease protein LivH    |
| ABC transporter                            | prot_02414               | Hydroxymethylpyrimidine ABC transporter, ATPase component                                                  | prot_02525    | ABC transporter, ATP-binding protein                                |
| ABC transporter                            | prot_02412               | Hydroxymethylpyrimidine ABC transporter, transmembrane component                                           |               |                                                                     |
| Acyl carrier protein                       | prot_00239<br>prot_06194 | 3-hydroxybutyryl-CoA dehydrogenase Acyl carrier protein                                                    |               |                                                                     |
| ATP-binding protein                        |                          |                                                                                                            | prot_02589    | hypothetical protein                                                |
| Channels and pores                         |                          |                                                                                                            | prot_05327    | hypothetical protein                                                |
| Chitin-binding protein                     | prot_06349               | Chitin binding protein                                                                                     | prot_04355    | Chitin binding protein                                              |
| DUF3307 domain-containing protein          | prot_03023               | hypothetical protein                                                                                       |               |                                                                     |
| Electron transport                         |                          |                                                                                                            | prot_00069    | NADH-ubiquinone/plastoquinone oxidoreductase, chain 3               |
| Electron transport                         |                          |                                                                                                            | prot_00067    | NADH-ubiquinone oxidoreductase chain H                              |
| Electron transport                         |                          |                                                                                                            | prot_00066    | NAD(P)H-quinone oxidoreductase chain J                              |
| Electron transport                         |                          |                                                                                                            | prot_00065    | NADH-ubiquinone oxidoreductase chain K                              |
| Electron transport                         |                          |                                                                                                            | prot_00064    | NADH-ubiquinone oxidoreductase chain L                              |
| Electron transport                         |                          |                                                                                                            | prot_00063    | NADH-ubiquinone oxidoreductase chain M                              |
| Electron transport                         |                          |                                                                                                            | prot_00062    | NADH-ubiquinone oxidoreductase chain N                              |
| Electron transport                         | prot_04025               | Na(+) H(+) antiporter subunit D                                                                            | prot_06354    | Na(+) H(+) antiporter subunit D                                     |
| Electron transport                         | prot_04024               | Na(+) H(+) antiporter subunit C                                                                            | prot_06355    | Na(+) H(+) antiporter subunit C                                     |
| Electron transport                         | prot_04023               | Na(+) H(+) antiporter subunit A / Na(+) H(+) antiporter subunit B                                          | prot_06356    | Na(+) H(+) antiporter subunit A / Na(+) H(+) antiporter subunit B   |
| Helix-turn-helix domain-containing protein | prot_03940               | Transcriptional regulator, LcIR family                                                                     | prot_04216    | Transcriptional regulator, LcIR family                              |
| Helix-turn-helix domain-containing protein | prot_01661               | putative DNA-binding protein                                                                               | prot_03089    | Uncharacterized protein with N-terminal Xre-type DNA-binding domain |
| Helix-turn-helix domain-containing protein | prot_05547               | hypothetical protein                                                                                       |               |                                                                     |
| Hydrolase                                  | prot_02379               | Fumarylacetoacetase                                                                                        | prot_02773    | Fumarylacetoacetase                                                 |
| Hydrolase                                  | prot_00597               | Adenosylhomocysteinase                                                                                     |               |                                                                     |
| Hydrolase                                  | prot_02085               | amidohydrolase                                                                                             |               |                                                                     |
| Hydrolase                                  | prot_01198               | RidA/YER057c/UK114 superfamily protein                                                                     |               |                                                                     |
| Ion Transport                              | prot_00622               | Sodium/calcium antiporter                                                                                  | prot_02968    | Sodium/calcium antiporter                                           |
| Ion Transport                              | prot_03982               | KtrAB potassium uptake system, peripheral membrane component KtrA                                          | prot_03107    | KtrAB potassium uptake system, peripheral membrane component KtrA   |
| Ion Transport                              | prot_03983*              | KtrAB potassium uptake system, integral membrane component KtrB                                            | prot_03108    | KtrAB potassium uptake system, integral membrane component KtrB     |
| Isomerase                                  | prot_05444               | mandelate racemase family protein Pfl_3283                                                                 | prot_00114    | mandelate racemase family protein Pfl_3283                          |
| MFS transporter                            |                          |                                                                                                            | prot_00423    | Uncharacterized MFS-type transporter                                |
| NUDIX domain-containing protein            | prot_00596               | Adenosylhomocysteinase                                                                                     | prot_02184    | NTP pyrophosphohydrolases including oxidative damage repair enzymes |
| Oxidoreductase                             | prot_05430               | FMN reductase (NADPH)                                                                                      |               |                                                                     |
| Oxidoreductase                             | prot_06195               | 3-hydroxybutyryl-CoA dehydrogenase                                                                         | prot_01237    | 3-hydroxyacyl-CoA dehydrogenase                                     |
| Oxidoreductase                             | prot_00514               | Acyl-CoA dehydrogenase                                                                                     | prot_05664    | Acyl-CoA dehydrogenase                                              |
| Oxidoreductase                             | prot_00878               | 2,5-dioxovalerate dehydrogenase                                                                            | prot_00936    | 2,5-dioxovalerate dehydrogenase                                     |
| Oxidoreductase                             | prot_02875               | Formaldehyde dehydrogenase MscR, NAD/mycothiol-dependent (EC 1.2.1.66) / S-nitrosomycothiol reductase MscR |               |                                                                     |
| Oxidoreductase                             | prot_01388               | 3-oxoacyl-[acyl-carrier protein] reductase                                                                 | prot_00237    | Oxidoreductase, short-chain dehydrogenase/reductase family          |
| Oxidoreductase                             | prot_04843               | Oxidoreductase, short-chain dehydrogenase/reductase family                                                 | prot_03132    | Oxidoreductase, short-chain dehydrogenase/reductase family          |
| Peptidase                                  | prot_05414               | hypothetical protein                                                                                       | prot_00679    | hypothetical protein                                                |
| Phosphatase                                | prot_00515               | FkbH like protein                                                                                          |               |                                                                     |
| Transcriptional regulator                  | prot_04397               | hypothetical protein                                                                                       |               |                                                                     |
| Transferase                                | prot_01692               | Acetyltransferase                                                                                          | prot_00581    | Acetyltransferase, GNAT family                                      |
| Transferase                                | prot_05262               | hypothetical protein                                                                                       |               |                                                                     |

\* Identified using annotation-only (keyword) search

**Table S6:** Putative biosynthetic gene clusters (BGCs) for isolate MA3\_2.13.

| #BGC | Localization      | Length (kb) | BGC type <sup>a</sup>       | Most Similar BGC from MIBiG <sup>b</sup> |
|------|-------------------|-------------|-----------------------------|------------------------------------------|
| 1    | 212807...297030   | 84,2        | hybrid NRPS-T1PKS           |                                          |
| 2    | 555098...599235   | 44,1        | iT1PKS                      |                                          |
| 3    | 886399...894213   | 7,8         | other/siderophore           | desferrioxamine E - BGC0001478 (50%)     |
| 4    | 939435...949851   | 10,4        | other                       | ectoine - BGC0000853 (100%)              |
| 5    | 1325419...1343987 | 18,6        | terpene                     |                                          |
| 6    | 1464068...1579833 | 115,8       | hybrid NRPS-T1PKS           |                                          |
| 7    | 2787528...2810209 | 22,7        | RiPP/class IV lanthipeptide |                                          |
| 8    | 3075560...3167749 | 92,2        | NRPS                        | atratumycin - BGC0001975 (52%)           |
| 9    | 3185683...3228931 | 43,2        | T3PKS                       |                                          |
| 10   | 3241764...3263490 | 21,7        | terpene                     | geosmin - BGC0001181 (100%)              |
| 11   | 3509738...3532272 | 22,5        | RiPP/lasso peptide          |                                          |
| 12   | 3581811...3602363 | 20,6        | terpene                     |                                          |
| 13   | 4069820...4096256 | 26,4        | RiPP/class I lanthipeptide  |                                          |
| 14   | 4661162...4702310 | 41,1        | Other                       | triacsins - BGC0001983 (71%)             |
| 15   | 4969959...5015964 | 46,0        | PKS-like (hgIE)             |                                          |
| 16   | 5623436...5637943 | 14,5        | other/siderophore           |                                          |
| 17   | 5754307...5765146 | 10,8        | RiPP                        |                                          |
| 18   | 5875209...6035077 | 159,9       | T1PKS                       |                                          |
| 19   | 6156127...6204196 | 48,1        | hybrid NRPS-T1PKS           |                                          |
| 20   | 6266254...6302465 | 36,2        | RiPP/thiopeptide            |                                          |
| 21   | 6303108...6391716 | 88,6        | T1PKS                       |                                          |
| 22   | 6391965...6521694 | 129,7       | T1PKS                       |                                          |
| 23   | 6521785...6625074 | 103,3       | hybrid NRPS-T1PKS           |                                          |
| 24   | 6624965...6705434 | 80,5        | hybrid NRPS-T1PKS           | arsono-polyketide - BGC0001283 (79%*)    |
| 25   | 6825090...6846932 | 21,8        | terpene                     |                                          |
| 26   | 6868736...6909845 | 41,1        | T3PKS                       |                                          |
| 27   | 6993789...7031495 | 37,7        | hybrid NRPS-T1PKS           |                                          |
| 28   | 7031391...7054390 | 23,0        | RiPP/class II lanthipeptide |                                          |
| 29   | 7085908...7195061 | 109,2       | T1PKS                       | BE-14106 - BGC0000029 (64%)              |
| 30   | 7202972...7252454 | 49,5        | hybrid NRPS-T1PKS           |                                          |
| 31   | 7312007...7422495 | 110,5       | hybrid NRPS-T1PKS           | JBIR-100 - BGC0001348 (72%*)             |
| 32   | 7422526...7507697 | 85,2        | hybrid NRPS-T1PKS           | neocarzin A - BGC0000111 (85%*)          |

a) BGC type as defined in antiSMASH tool

b) Most similar MIBiG BGC (percentage of genes showing similarities to MIBiG BGC). Only BGC sharing gene similarities above 50% are indicated.

\* - similarity only with the PKS cluster

**Table S7:** Putative biosynthetic gene clusters (BGCs) for isolate S07\_1.15.

| No BGC | localization      | Length (kb) | BGC type <sup>a</sup>        | Similarity with MIBiG BGC <sup>b</sup> | Similarity with <i>S. xinghaiensis</i> BGCs <sup>c</sup> |
|--------|-------------------|-------------|------------------------------|----------------------------------------|----------------------------------------------------------|
| 1      | 55375...78081     | 22,7        | RiPP/lasso peptide           | citrulassin B - BGC0001549 (100%)      | 43% (Las1)                                               |
| 2      | 504455...585511   | 81,1        | NRPS                         | isocomplestatin - BGC0000326 (93%)     | 100% (Nrps1)                                             |
| 3      | 684602...702094   | 17,5        | terpene                      |                                        | 93% (Tep1)                                               |
| 4      | 745877...754214   | 8,3         | RiPP                         |                                        | 16% (Bac1)                                               |
| 5      | 950051...983589   | 33,5        | other/saccharide             | neomycin - BGC0000709 (50%)            | 96% (Neo1)                                               |
| 6      | 1031310...1056553 | 25,2        | RiPP/class i lanthipeptide   |                                        | 26% (Lan1)                                               |
| 7      | 1068441...1093528 | 25,1        | terpene                      | hopene - BGC0000663 (53%)              | 95% (Tep2)                                               |
| 8      | 1169531...1185264 | 15,7        | terpene                      |                                        | 90% (Tep3)                                               |
| 9      | 1265412...1301282 | 35,9        | RiPP/thiopeptide             |                                        | 100% (Thio1)                                             |
| 10     | 1413432...1421436 | 8,0         | Other/siderophore            | desferrioxamine E - BGC0001478 (100%)  | 71% (Sid1)                                               |
| 11     | 1499427...1508922 | 9,5         | RiPP                         |                                        | 100% (Bac2)                                              |
| 12     | 1667469...1709648 | 42,2        | RiPP/class v lanthipeptide   |                                        | -                                                        |
| 13     | 1775028...1787157 | 12,1        | Other/siderophore            |                                        | 100% (Sid4)                                              |
| 14     | 2185930...2206765 | 20,8        | RiPP/class iii lanthipeptide |                                        | 100% (Lan2)                                              |
| 15     | 3247887...3271645 | 23,8        | terpene                      | isorenieratene - BGC0001456 (87%)      | 85% (Tep4)                                               |
| 16     | 3905019...3945332 | 40,3        | other/phenazine              |                                        | -                                                        |
| 17     | 4701256...4776588 | 75,3        | T2PKS                        |                                        | 76% (Pks2)                                               |
| 18     | 4995441...5006276 | 10,8        | RiPP                         |                                        | -                                                        |
| 19     | 5490378...5513110 | 22,7        | RiPP/class iii lanthipeptide | SapB - BGC0000551 (100%)               | LanKC                                                    |
| 20     | 5855823...5867586 | 11,8        | other/siderophore            |                                        | 100% (Sid3)                                              |
| 21     | 6009580...6019984 | 10,4        | Other                        | ectoine - BGC0000853 (100%)            | 100% (Ect1)                                              |
| 22     | 6637363...6659228 | 21,9        | terpene                      |                                        | -                                                        |
| 23     | 7006369...7047466 | 41,1        | T3PKS                        |                                        | 89% (Pks3)                                               |
| 24     | 7052668...7064578 | 11,9        | RiPP                         |                                        | 90% (Bac3)                                               |

a) BGC type as defined in antiSMASH tool

b) Most similar MIBiG BGC (percentage of genes showing similarities to MIBiG BGC). Only BGC sharing gene similarities above 50% are indicated.

c) BGC defined in [24]



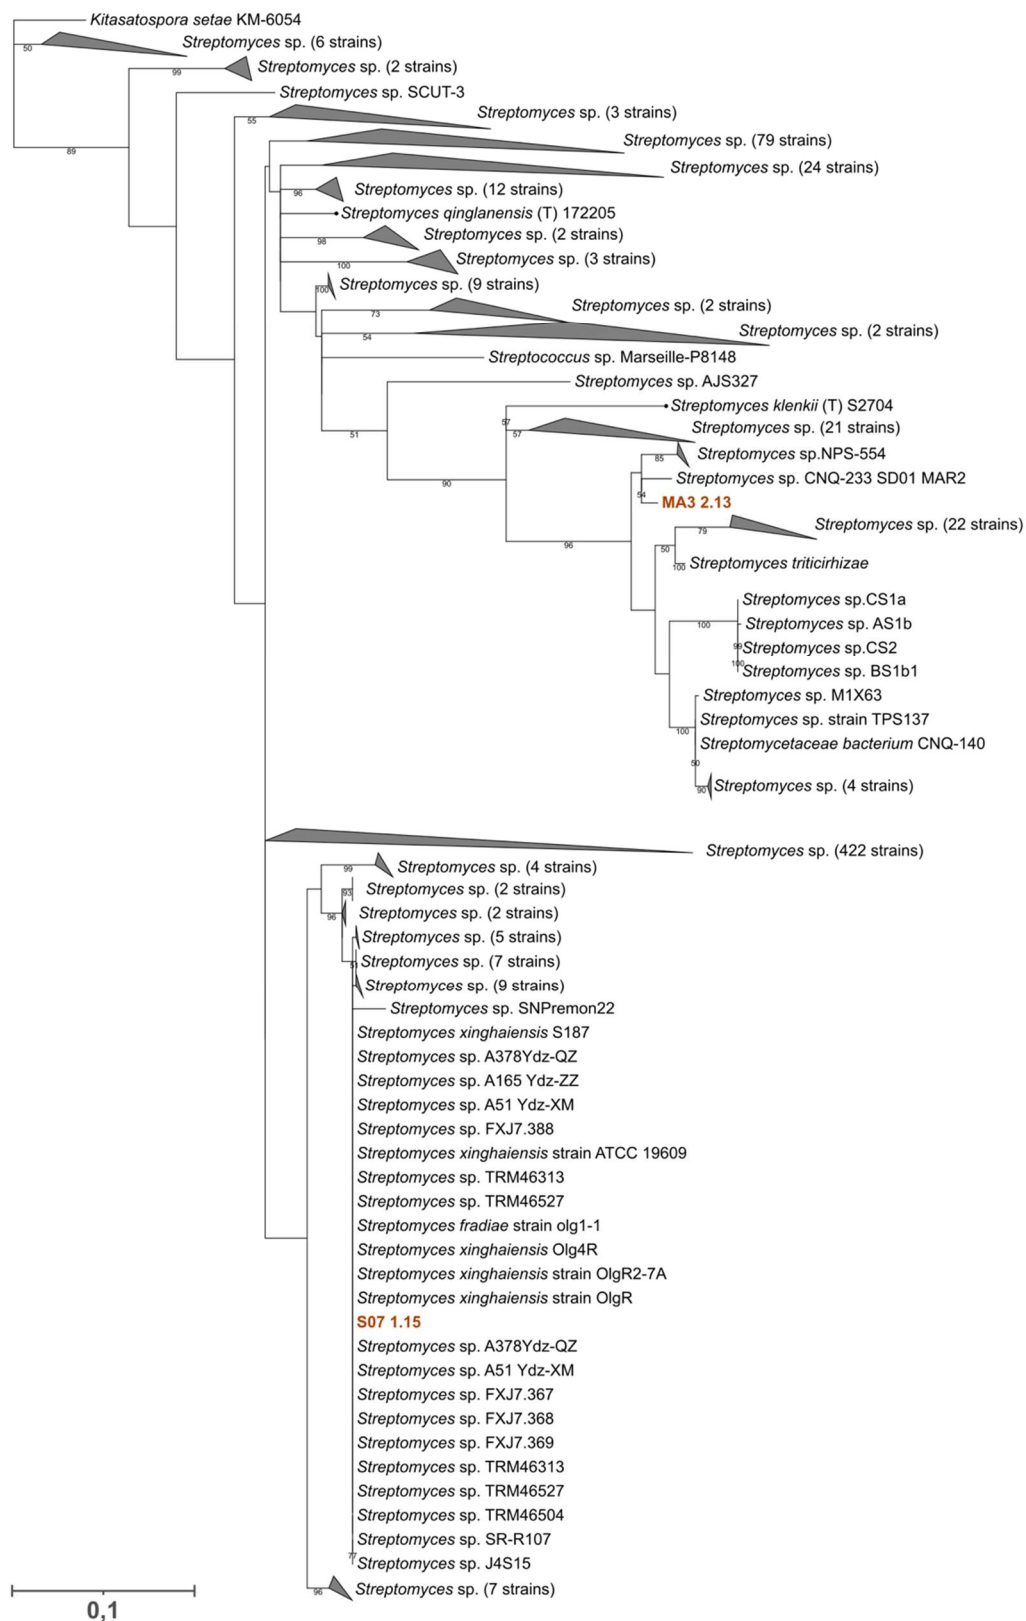

**Figure S1:** Maximum likelihood phylogenetic tree (GTR+G+I) of the 16S rRNA sequences of isolates MA3\_2.13 and S07\_1.15 (highlighted in red) and 683 *Streptomyces* sp. *Kitasatospora setae* KM-6054 was used as outgroup. Bootstrap values from 1000 replications are shown at branch points. Bar, 0.1 substitution per site.

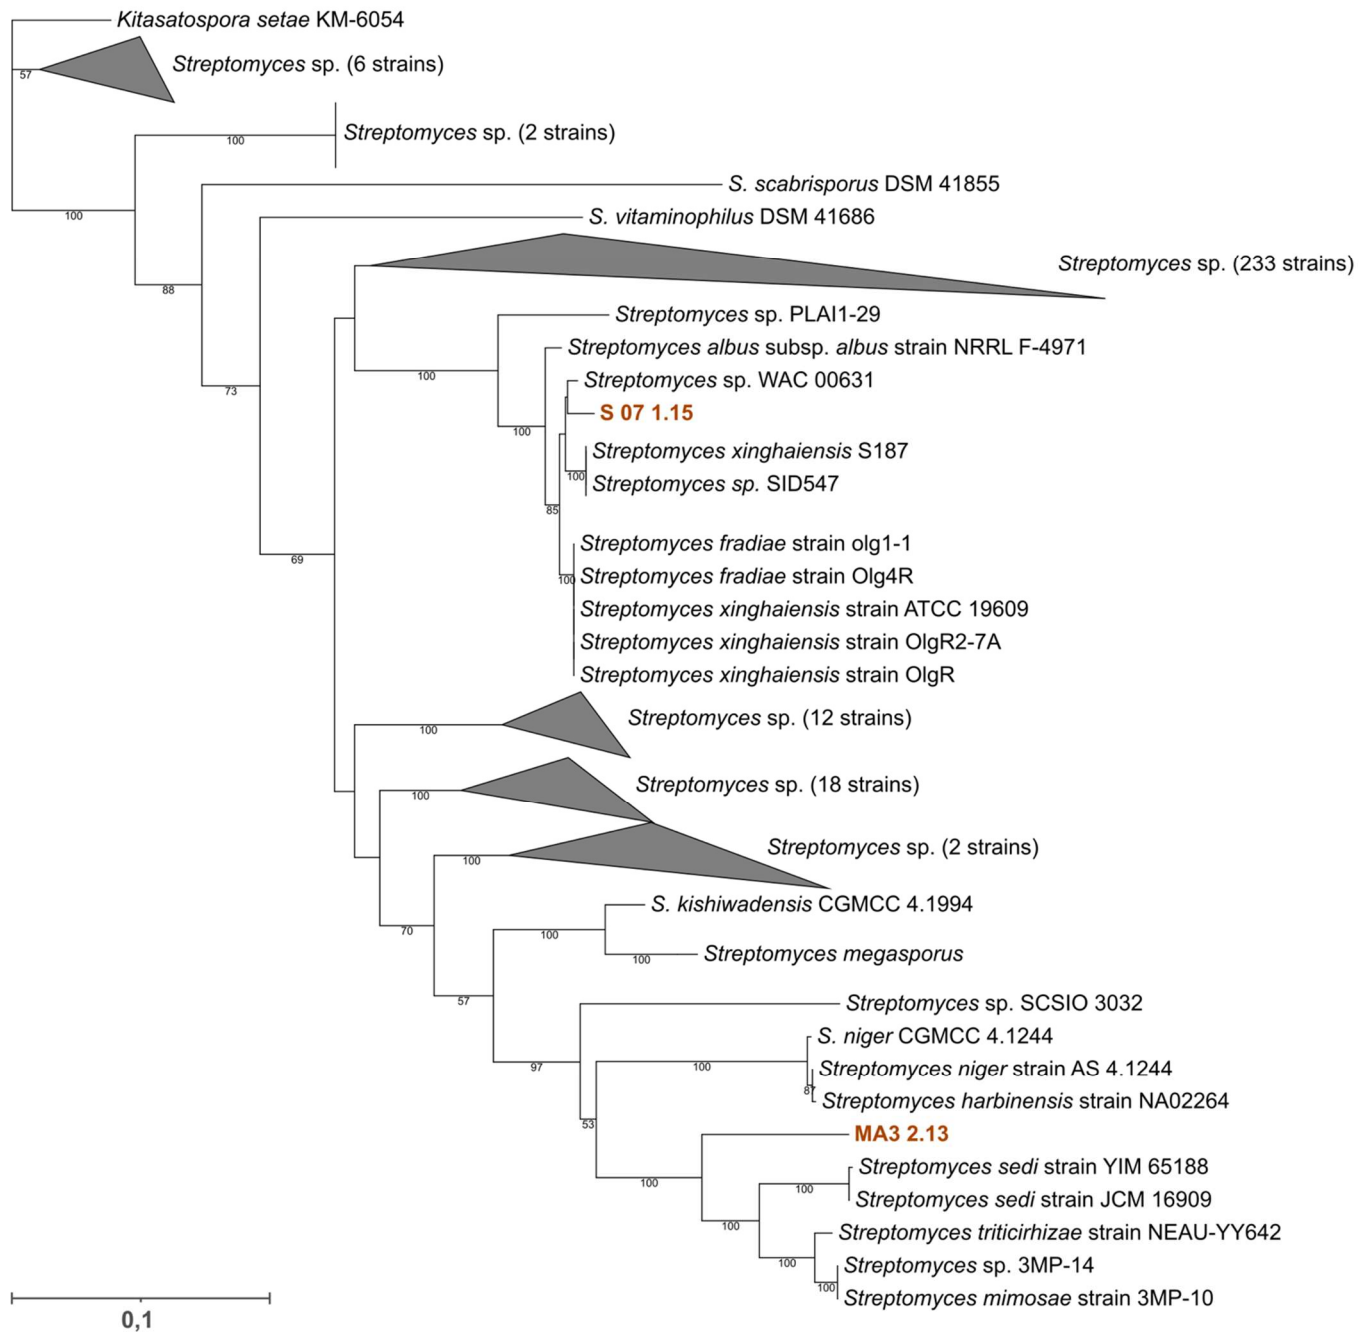

**Figure S2:** Maximum likelihood phylogenetic tree (GTR+G+I, 2000 Bootstrap replicates), based on five gene sequences (*atpD*, *gyrB*, *recA*, *rpoB* and *trpB*) concatenated manually, showing the phylogenetic relationship of isolates MA3\_2.13 and S07\_1.15 with members of the *Streptomyces* genus (N=300). *Kitasatospora setae* KM-6054 was used as outgroup. Portions of the tree collapsed are labelled and numbers represent the number of strains in the collapsed subtrees.
